# Supplementary material for: Poly(ethylene glycol) Diacrylate Hydrogels Doped with Silver Nanoparticles for Optical Sensing and Removing Hg(II) Ions from Water
Source: MDPI journal article supplement (doi:10.3390/chemosensors11100518), 2023-10-01
Supplement: s1 [file s1]

## Supporting Information

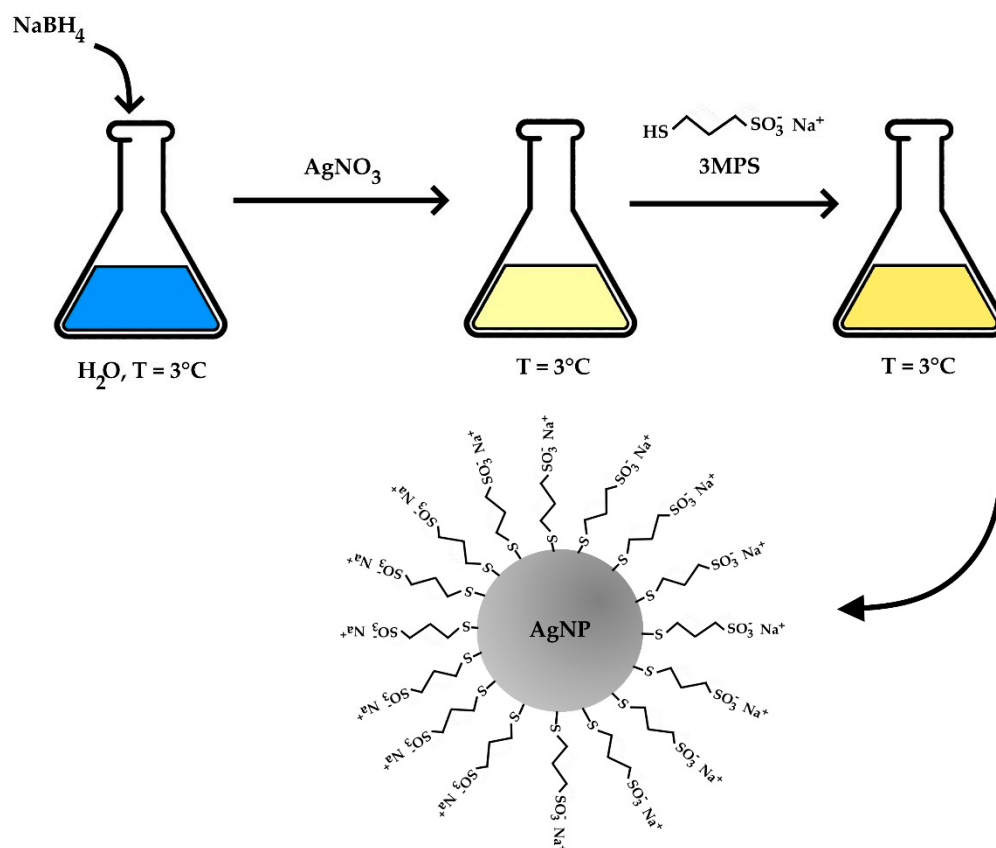

Figure S1. Schematic representation of the synthesis of AgNPs-3MPS.

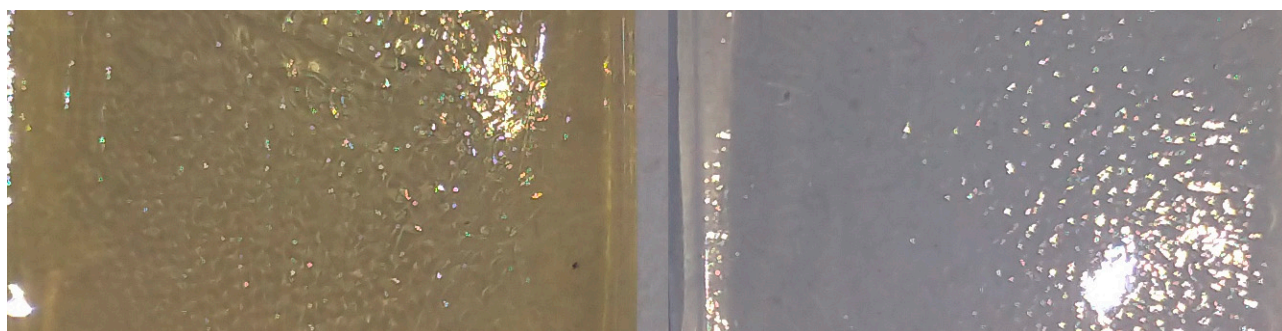

Figure S2. Picture of PEGDA-based hydrogels with AgNPs-3MPS: without Hg(II) interaction, left side, and after 24 h of interaction with Hg(II), right side.

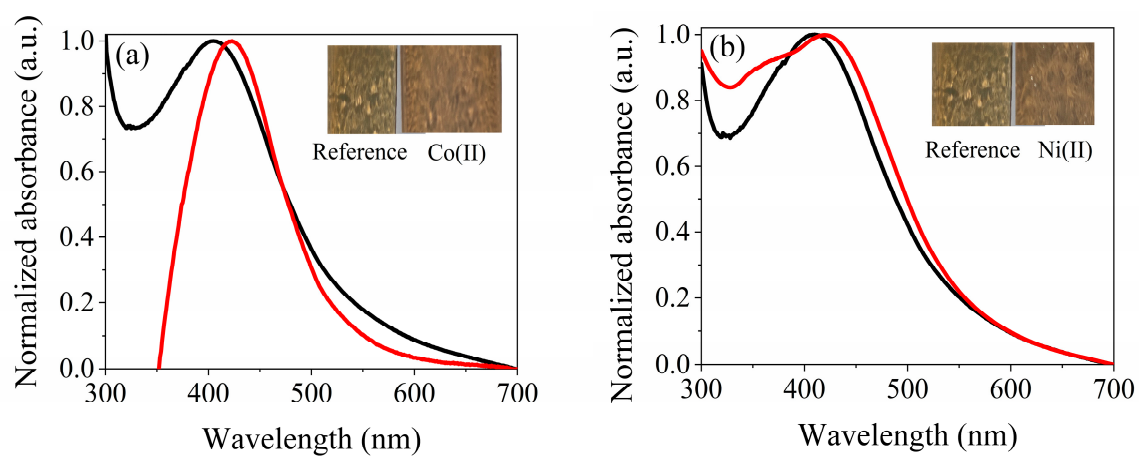

Figure S3. Normalized absorption spectra of PEGDA/AgNPS-3MPS matrices without contamination black curves and in presence of 1 mg/L of Co(II) (a) and Ni(II) (b), red lines.

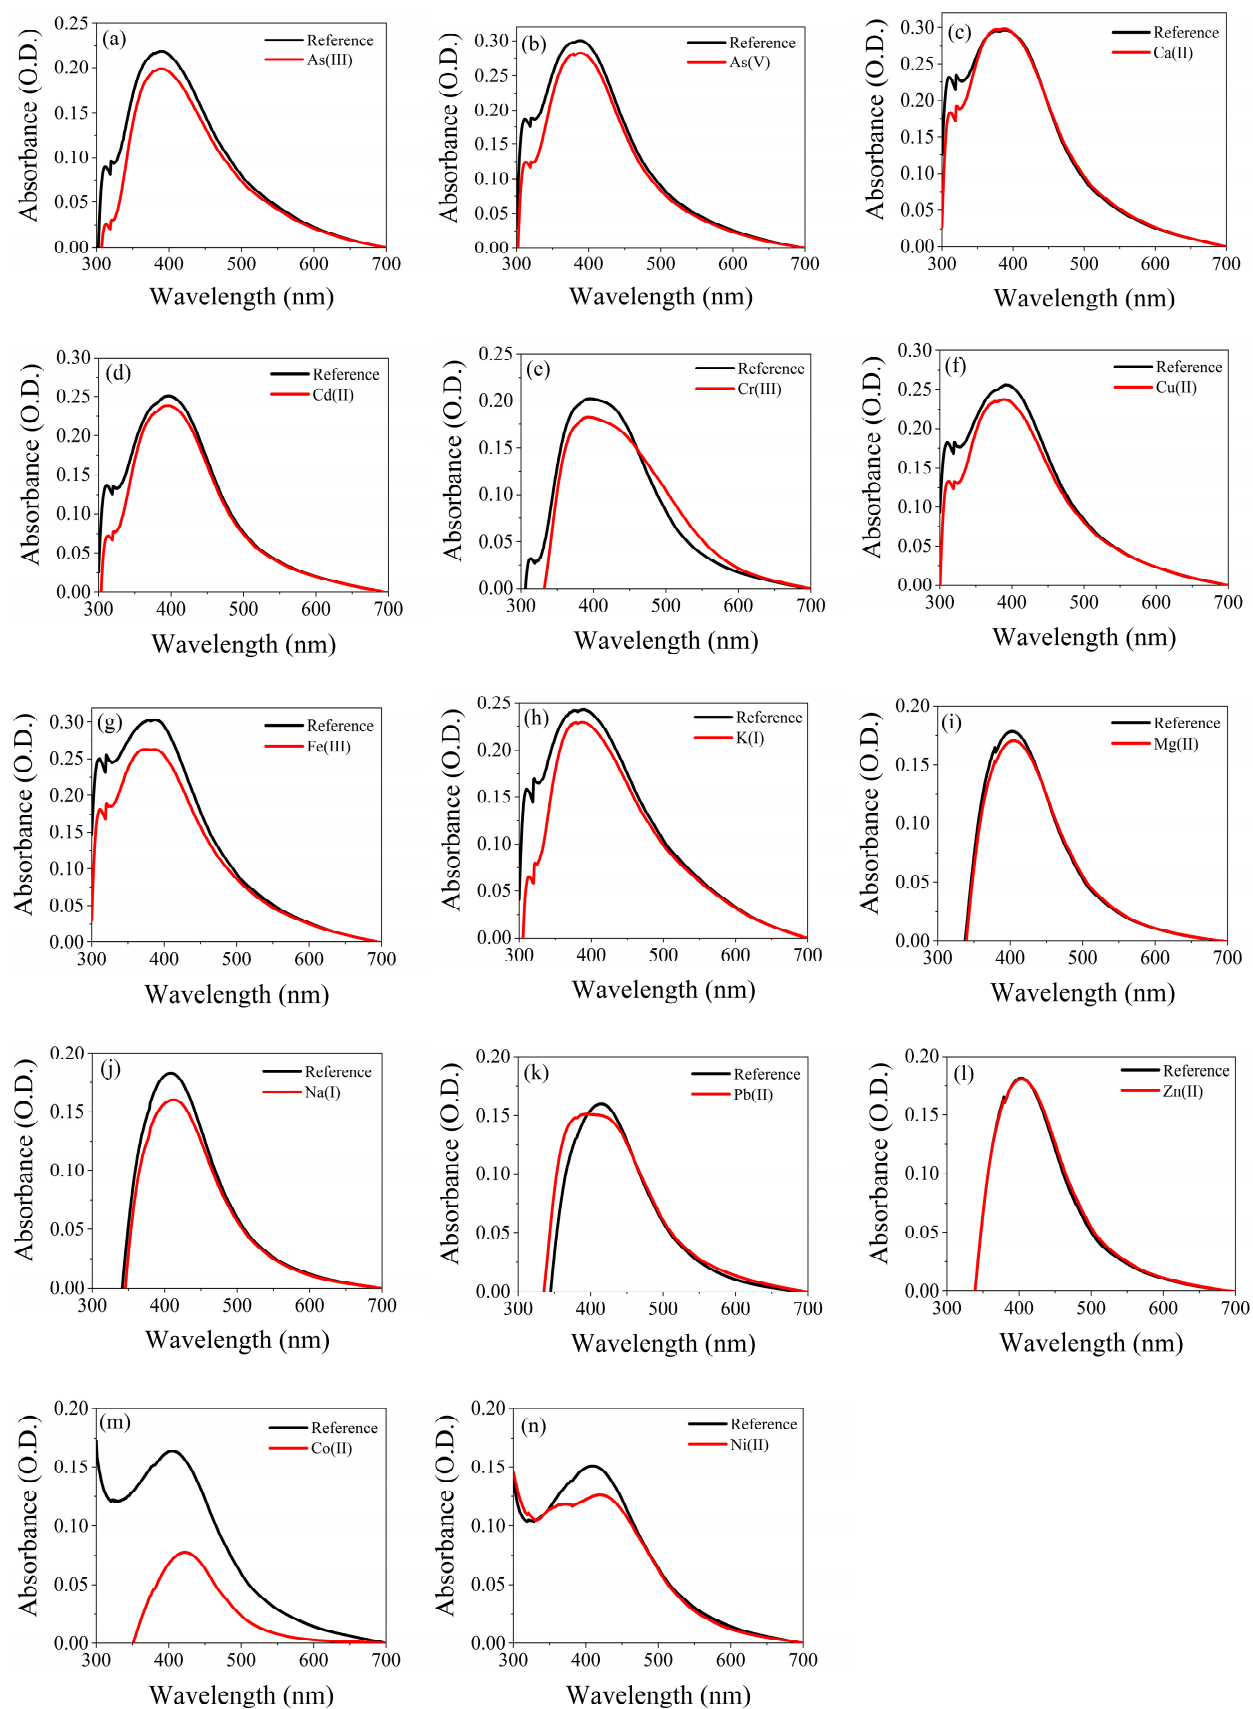

Figure S4. UV-Vis spectra of PEGDA/AgNPs-3MPS hydrogels with different metal ions at the concentration of 1 mg/L: (a) As(III); (b) As(V); (c) Ca(II); (d) Cd(II); (e) Cr(III); (f) Cu(II); (g) Fe(III); (h) K(I); (i) Mg(II); (j) Na(I); (k) Pb(II); (l) Zn(II), (m) Co(II); and (n) Ni(II).

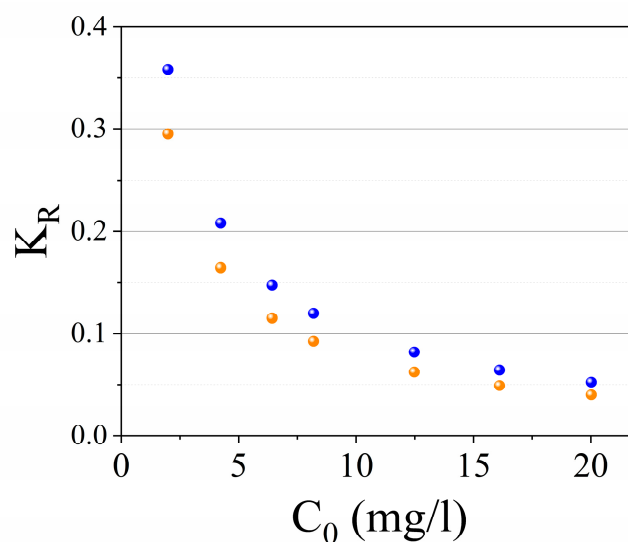

Figure S5. Separation factor as a function of initial concentration of Hg(II), and the blue points refer to undoped hydrogel, while orange points represent the AgNPs-3MPS-doped hydrogel.

#### Determination of the Limit Of Detection (LOD, $3\sigma$ )

To obtain the limit of detection, we started from determining the error (standard deviation,  $\sigma$ ) of the blank, namely the value of the maximum of the adsorption band. By measuring several times the absorption spectrum, the standard deviation ( $\sigma$ ) is calculated on the values of the maximum absorption. By definition, LOD is equal to  $3\sigma$ , thus the standard deviation is triplicate and put into a system with the equation of the linear equation that coming from the linear fit. In our case,  $\sigma = 0.003$ , now exploiting the linear equation, we obtain  $3\sigma = 1.147x - 0.376$ , resolving for  $x$  we obtain a limit of detection equal to 0.3 mg/L.
